**Volume Kinetics for Infusion Fluids (Review Article) 470**

Volume kinetics, a tool for analyzing the kinetics of infusion fluids, is reviewed.

**Perioperative Hypothermia (33°C) Does Not Increase the Occurrence of Cardiovascular Events in Patients Undergoing Cerebral Aneurysm Surgery 327**

Intraoperative hypothermia was not associated with an increased occurrence of cardiovascular events.

**Cosyntropin for Prophylaxis against Postdural Puncture Headache after Accidental Dural Puncture 413**

Cosyntropin was superior to placebo for prophylaxis against postdural puncture headache.

**Management of Postesophagectomy Respiratory Failure with Noninvasive Ventilation (Case Scenario) 454**

The report illustrates the potential benefits of noninvasive ventilation.

**Anemia and Patient Blood Management in Hip and Knee Surgery: A Systematic Review of the Literature (Review Article) 482**

Anemia in the orthopedic perioperative setting is reviewed.

**Increase of Oxygen Consumption during a Progressive Decrease of Ventilatory Support Is Lower in Patients Failing the Trial in Comparison with Those Who Succeed 378**

Weaning failure from ventilator support may occur because of an increased mechanical load and increased oxygen consumption ( $\dot{V}O_2$ ) and demand. To test this hypothesis, patients ( $N = 28$ ) ventilated for at least 30 days and deemed eligible for weaning were enrolled to measure oxygen consumption and respiratory distress requiring reventilation. Pressure support was incrementally decreased from 20 to 0 cm H<sub>2</sub>O followed by 1 h at 0 cm H<sub>2</sub>O. Weaning failure occurred in 12 of 28 patients. In the failure group, minimum mean oxygen consumption was higher ( $174 \pm 44$  vs.  $215 \pm 53$  ml/min,  $P < 0.05$ ), respiratory drive increased more, and there was a smaller increase in oxygen consumption. In contrast to the authors' hypothesis, patients who failed a decremental pressure support weaning trial had a higher baseline oxygen consumption and were not able to increase their oxygen consumption in response to an increased demand. See the accompanying Editorial View on page 273

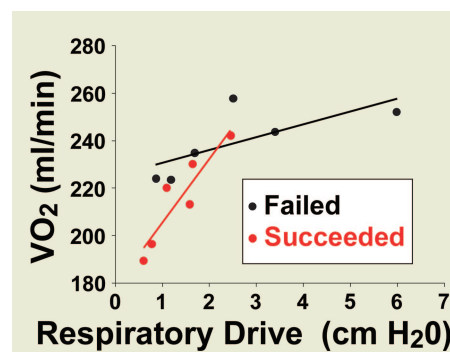**Multicenter, Randomized, Comparative Cost-effectiveness Study Comparing 0, 1, and 2 Diagnostic Medial Branch (Facet Joint Nerve) Block Treatment Paradigms before Lumbar Facet Radiofrequency Denervation 395**

Despite the frequency of use and potential utility of diagnostic blocks of facet joint pain, proper selection of patients for radiofrequency denervation remains unclear. In this multicenter study, patients ( $N = 151$ ) with suspected lumbar facetogenic pain were randomized to radiofrequency denervation based solely on clinical findings (group 0); denervation contingent on a positive response to a single diagnostic block (group 1); and denervation only after a positive response to comparative blocks done with lidocaine and bupivacaine (group 2). Then pain relief to radiofrequency denervation was measured. Successful outcomes were observed at 3 months in 17 (33%), 8 (16%), and 11 (22%) patients in groups 0, 1, and 2, respectively. Pain scores at functional capacity were significantly lower in group 2 patients compared with other groups at 3 months but not 1 month. The associated costs were highest in group 1 (\$17,142) compared with group 0 (\$6,286) or group 2 (\$15,241). See the accompanying Editorial View on page 276

**Anesthetic Management and Surgical Site Infections in Total Hip or Knee Replacement: A Population-based Study 279**

Through review of a claims database, this study examined the risk of surgical site infections (SSIs) within 30 days of surgery for patients ( $N = 3,081$ ) receiving total hip or knee replacement with general versus those with epidural/spinal anesthesia. SSIs occurred in 56 (1.8%) of all patients; of these, 33 had general anesthesia and 23 had epidural or spinal anesthesia ( $P = 0.002$ ). After adjusting for baseline factors and comorbidities, the odds of SSI for patients receiving total hip or knee replacement with general anesthesia were 2.21 (95% confidence interval = 1.25–3.90,  $P = 0.007$ ) times higher than for those who had the same procedure with epidural/spinal anesthesia. This study supports previous reports that risk of SSI is higher in patients undergoing total hip or knee replacement with general anesthesia compared with epidural/spinal anesthesia. See the accompanying Editorial View on page 265
